# Supplementary material
Source: publisher figshare collection journal article supplement (https://acs.figshare.com/ndownloader/files/8915206)
Supplement: Supplementary file 1 [file 8915206]

## SUPPORTING INFORMATION

### ***Streptomyces virginiae* PPDC is a New Type of Phenylpyruvate Decarboxylase Composed of Two Subunits**

Xiaoshu Xu<sup>1,3</sup>, Chao Wang<sup>2</sup>, Jun Chen<sup>1</sup>, Sheng Yang<sup>\*1,4</sup>

<sup>1</sup>Key Laboratory of Synthetic Biology and <sup>2</sup>National Key Laboratory of Plant Molecular Genetics, Institute of Plant Physiology and Ecology, Shanghai Institutes for Biological Sciences, Chinese Academy of Sciences, Shanghai 200032, China.

<sup>3</sup>University of Chinese Academy of Sciences, Beijing 100049, China

<sup>4</sup>Jiangsu National Synergetic Innovation Center for Advanced Materials (SICAM), Nanjing 210009, China.

#### **Inventory of Supporting Items:**

#### **Supporting Methods**

#### **Supporting Tables and Figures**

**Table S1.** Plasmids and primers used in this study

**Figure S1.** Kinetics of *Sc*PPDC with respect to phenylpyruvate

## Reagents

The enzymes for DNA manipulation were from Fermentas (Thermo Fisher Scientific Inc.) or Vazyme (Vazyme Biotech Co., Ltd.). The other main chemicals used, including sodium phenylpyruvate, sodium pyruvate, thiamine pyrophosphate,  $\text{MgCl}_2 \cdot 6\text{H}_2\text{O}$ , and phenylacetaldehyde were purchased from Sigma-Aldrich.

## Protein expression and preparation of *E.coli* crude lysate

Recombinant proteins were overexpressed in *E.coli* BL21 (DE3). The cells harboring different plasmids were grown in Luria-Bertani (LB) medium supplemented with kanamycin (50  $\mu\text{g/mL}$ ) or ampicillin (100  $\mu\text{g/mL}$ ) overnight at 37 °C. Fresh LB medium (100 mL) containing the relevant antibiotic was inoculated with a 1 mL overnight preculture. Cells were grown at 37 °C until the cultures reached an  $A_{600}$  of 0.6–0.8 and then IPTG (0.5 mM final concentration) was added to induce protein expression. After incubation for 5 h at 30 °C while shaking, cells were harvested at 5000 rpm for 20 min.

Cells were suspended in 7 mL buffer A (50 mM Tris-HCl, 200 mM NaCl, 2 mM DTT, pH8.0). The suspension was subjected to a French press (Constant Systems Limited) followed by centrifugation at 12000 rpm for 1 h at 4 °C to remove insoluble debris. The resultant insoluble pellets and soluble proteins were analyzed by SDS-PAGE. *E.coli* BL21 (DE3) transformed with empty vector (Ev) was treated in the same way, and was used as the negative controls.

## Qualitative detection by GC-MS

We used an Agilent 7890 A GC system equipped with a G4567 A auto-sampler and a quadrupole time-of-flight Agilent 7200 B mass spectrometer (Agilent Technologies). An apolar HP-5MS (5% phenyl-polymethyl siloxane) capillary column (30-m length, 250  $\mu\text{m}$  i.d., and 0.25  $\mu\text{m}$  film thickness) (Agilent Technologies) was used. The gas carrier was helium with a flow rate of 1.5 mL/min. The temperature of the injector

and detector were set as 220 °C and 300 °C, respectively. The column temperature was maintained at 50 °C for 2 min, then increased to 210 °C at a rate of 10 °C/min. Split ratio was kept at 5:1 and mass spectra were acquired in the range 30–500 *m/z*. For qualitative analysis of the products, 1 µL isooctane extracts was injected.

**Table S1** Plasmids and primers used in this study

| Plasmids or Primers                                                            | Description or Sequences <sup>a</sup> (5'→3')                                                                                                                 | source or reference |
|--------------------------------------------------------------------------------|---------------------------------------------------------------------------------------------------------------------------------------------------------------|---------------------|
| <b>Plasmids</b>                                                                |                                                                                                                                                               |                     |
| pET28a                                                                         | Cloning and expression vector                                                                                                                                 | Novagen             |
| pETDuet-1                                                                      | Cloning and expression vector                                                                                                                                 | Novagen             |
| pET28a-NT-SvPPDC $\alpha$                                                      | pET28a derivate carrying <i>SvPPDC<math>\alpha</math></i> gene with an N-terminal histag                                                                      | This study          |
| pET28a-NT- <i>SvPPDC<math>\beta</math></i>                                     | pET28a derivate carrying <i>SvPPDC<math>\beta</math></i> gene with an N-terminal histag                                                                       | This study          |
| pETDuet-NT-SvPPDC $\alpha$ /<br>$\beta$                                        | pETDuet-1 derivate carrying <i>SvPPDC<math>\alpha</math></i> and <i>SvPPDC <math>\beta</math></i> gene with hexahistidine tags fused to their N termini       | This study          |
| pETDuet-SNT-SvPPDC $\alpha$<br>$\beta$                                         | pETDuet-1 derivate carrying N-terminal his-tagged <i>SvPPDC<math>\alpha</math></i> gene and non-tagged <i>SvPPDC <math>\beta</math></i> gene                  | This study          |
| pETDuet-NT-SvPPDC $\alpha$ <sup>G</sup><br><sup>167A</sup> / $\beta$           | pETDuet-NT- <i>SvPPDC<math>\alpha</math>/<math>\beta</math></i> derivate carrying a mutation G167A in <i>SvPPDC<math>\alpha</math></i> gene                   | This study          |
| pETDuet-NT-SvPPDC $\alpha$ <sup>G</sup><br><sup>167AD168AG169A</sup> / $\beta$ | pETDuet-NT- <i>SvPPDC <math>\alpha</math>/<math>\beta</math></i> derivate carrying mutations G167A, D168A and G169A in <i>SvPPDC <math>\alpha</math></i> gene | This study          |
| pETDuet-NT-SvPPDC $\alpha$ /<br>$\beta$ <sup>E47A</sup>                        | pETDuet-NT- <i>SvPPDC <math>\alpha</math>/<math>\beta</math></i> derivate carrying a mutations E47A in <i>SvPPDC<math>\beta</math></i> gene                   | This study          |
| pET28a-NT-ScPPDC                                                               | pET28a derivate carrying <i>ScPPDC</i> gene with an N-terminal histag                                                                                         | This study          |
| <b>Primers<sup>b</sup></b>                                                     |                                                                                                                                                               |                     |
| 28a-NT-SvPPDC $\alpha$ -F                                                      | CCTGGTGCCGCGCGGCAGCCATATGGTGA                                                                                                                                 |                     |
| 28a-NT-SvPPDC $\alpha$ -R                                                      | CCGTACTCGAAGCGGCCACCG                                                                                                                                         |                     |
| 28a-NT- <i>SvPPDC<math>\beta</math></i> -F                                     | CAAGCTTGTGACGGAGCTCGAATTCCTCA                                                                                                                                 |                     |
| 28a-NT- <i>SvPPDC<math>\beta</math></i> -R                                     | GTCCCCCTGTCCGTCCGCGGCCAGTTC                                                                                                                                   |                     |
| Duet-NT-SvPPDC $\alpha$ -F                                                     | CTGGTGCCGCGCGGCAGCCATATGATGTC                                                                                                                                 |                     |
| Duet-NT-SvPPDC $\alpha$ -R                                                     | CGGCCCAGGCTTGTGACCTGCAGTCAG                                                                                                                                   |                     |
| Duet-NT-T7-F                                                                   | TCCCCCTGTCCGTCCGCGGCCAG                                                                                                                                       |                     |
| Duet-NT-T7-R                                                                   | CTGGCCGCGGACGGACAGGGGGACTGAC                                                                                                                                  |                     |
|                                                                                | TGCAGGTCGACAAGCTTGCGGCCG                                                                                                                                      |                     |
|                                                                                | CGCGCTGCTGTGGTGATGATGGTGATGGC                                                                                                                                 |                     |
|                                                                                | TGCTGCCCATATGATATATCTCCTTCTATA                                                                                                                                |                     |

|                                                 |                                        |
|-------------------------------------------------|----------------------------------------|
|                                                 | CTTAAC                                 |
|                                                 | ATGGGCAGCAGCCATCACCATCATCACCA          |
| Duet-NT- <i>SvPPDC</i> $\beta$ -F               | CAGCAGCGCGATGTCCGAGATCACCATG           |
|                                                 | GCCAAGG                                |
| Duet-NT- <i>SvPPDC</i> $\beta$ -R               | GTTTCTTTACCAGACTCGAGGGTACCTCA          |
|                                                 | TGCCGGGACCGCCTCCCATTCAG                |
| pETDuet-SNT-<br><i>SvPPDC</i> $\alpha/\beta$ -F | GTATAAGAAGGAGATATACATATGTCCG           |
|                                                 | AGATCACCATGGCCAAGGC                    |
| pETDuet-SNT-<br><i>SvPPDC</i> $\alpha/\beta$ -R | GCCTTGGCCATGGTGATCTCGGACATATG          |
|                                                 | TATATCTCCTTCTTATAC                     |
| <i>SvPPDC</i> $\alpha$ -G167A-F                 | GTGGCGCTCGCCTACATC <b>GCAG</b> ACGGCG  |
|                                                 | CCACCAGCGAGGGCGACTTC                   |
| <i>SvPPDC</i> $\alpha$ -G167A-R                 | GAAGTCGCCCTCGCTGGTGGCGCCGTCT <b>G</b>  |
|                                                 | CGATGTAGGCGAGCGCCAC                    |
| <i>SvPPDC</i> $\alpha$ -GDG-F                   | GATCGTGGCGCTCGCCTACATC <b>GCAGCC</b>   |
|                                                 | <b>GCAGCC</b> ACCAGCGAGGGCGACTTC       |
| <i>SvPPDC</i> $\alpha$ -GDG-R                   | GAAGTCGCCCTCGCTGGTGGCT <b>TGCGGCT</b>  |
|                                                 | <b>GCGATGTAGGCGAGCGCCACGATC</b>        |
| <i>SvPPDC</i> $\beta$ -E47A-F                   | GATCACCGACGGGCTGGCCGCCGC <b>ATT</b> C  |
|                                                 | GGCGACGAACGCTGCTTC                     |
| <i>SvPPDC</i> $\beta$ -E47A-R                   | GAAGCAGCGTTCGTCGCCGAAT <b>TGCGGCG</b>  |
|                                                 | GCCAGCCCGTCGGTGATC                     |
| pET28a-NT- <i>ScPPDC</i> -F                     | CGGCCTGGTGCCGCGCGGCAGCCATATG           |
|                                                 | GCACCTGTTACAATTGAAAAGTTTCG             |
| pET28a-NT- <i>ScPPDC</i> -R                     | GTCGACGGAGCTCGAATTC <b>GGATCC</b> CTAT |
|                                                 | TTTTTATTCTTTTAAGTGCCGCTGCTTC           |

---

<sup>a</sup> the introduced restriction sites are underlined and the mutation sites are shown in bold;

<sup>b</sup> F: forward primer; R: reverse primer.

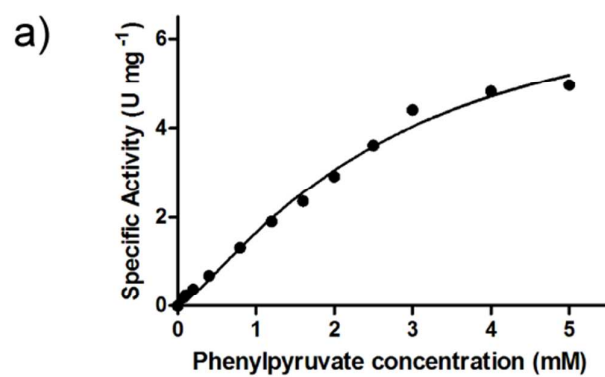

b)

| Kinetic parameters of wild-type ScPPDC |                 |                                |                                                     |
|----------------------------------------|-----------------|--------------------------------|-----------------------------------------------------|
| Enzyme                                 | $K_m$ [mM]      | $k_{cat}$ [min <sup>-1</sup> ] | $k_{cat}/K_m$ [min <sup>-1</sup> mM <sup>-1</sup> ] |
| ScPPDC                                 | $2.70 \pm 0.69$ | $537.60 \pm 81.0$              | $203.05 \pm 23.0$                                   |

**Figure S1** Kinetics of ScPPDC. a) Dependence of the reaction rate on phenylpyruvate concentrations for ScPPDC. The solid line is a fitted curve. b) Kinetic parameters of ScPPDC  $\alpha/\beta$ .
